# Supplementary material
Source: publisher site journal article supplement (https://www.spandidos-publications.com/3374/downloadSupplementary)
Supplement: Supplementary file 1 [file downloadSupplementary]

## Sheet: count-gene
Table SI. A total of 563 differentially expressed genes were identified between normal and colon cancer samples (N=44, T=568) in The Cancer Genome Atlas database.
Gene name	logFC	P-value	FDR	meanN	meanT
MMP2	0.160775	4.29×10-1	6.01×10-1	8161.15	9123.2
CD44	1.34881	6.41×10-37	2.55×10-35	4825.2	12290.1
ERCC5	0.233665	3.73×10-2	7.41×10-2	788.43	926.591
BTG2	-0.583013	4.14×10-7	2.06×10-6	7123.73	4755.39
HSPB1	-0.113115	4.68×10-1	6.46×10-1	11743	10857.6
SNHG16	1.3243	1.13×10-42	5.86×10-41	403.228	1009.9
CXCR4	-0.00320535	9.57×10-1	1.00×100	1275.41	1272.57
IGF1	-1.83983	3.34×10-18	4.59×10-17	95.5481	26.5872
GAS5	1.24561	6.99×10-18	9.37×10-17	3047.26	7225.93
PAK1	-0.211787	1.13×10-3	3.16×10-3	4275.58	3691.48
GDF15	3.04412	2.02×10-36	7.85×10-35	846.62	6984.56
TPX2	1.95662	7.66×10-48	4.75×10-46	1242.02	4821.2
EP300	-0.372716	8.44×10-6	3.49×10-5	4143.85	3199.76
MMP7	7.13502	3.80×10-44	2.09×10-42	17.5193	2473.51
NOS2	-0.0722313	7.47×10-1	9.27×10-1	2365.01	2249.52
TRIB3	3.89057	4.69×10-76	7.50×10-74	209.287	3106.26
IGF2BP3	4.12954	3.37×10-14	3.44×10-13	9.37031	165.935
CCNB1	1.56042	7.80×10-32	2.43×10-30	1080.43	3187.07
ZEB1	-1.77619	1.80×10-34	6.42×10-33	1849.16	539.547
ERG	-0.652691	1.84×10-6	8.39×10-6	353.523	224.56
SOD2	0.102514	3.94×10-1	5.61×10-1	11355	12191
FGFR1	-1.22392	2.86×10-18	3.95×10-17	2406.61	1030.14
MET	1.87419	5.68×10-48	3.55×10-46	1620.87	5942.36
BBC3	0.916012	7.39×10-12	6.14×10-11	445.354	840.763
NR4A2	-0.43028	1.10×10-2	2.48×10-2	771.087	572.149
UGT1A1	-2.88321	7.22×10-25	1.55×10-23	136.297	18.333
LEP	-1.57369	6.94×10-5	2.45×10-4	51.9995	17.5268
CCL22	0.0832431	7.03×10-1	8.85×10-1	158.599	168.055
BRCA1	1.29023	3.97×10-28	1.02×10-26	411.187	1005.59
CYP2D6	-2.39202	5.80×10-50	3.88×10-48	333.507	63.5291
RUNX3	-0.187577	2.70×10-1	4.11×10-1	649.7	570.472
CYP2C19	-0.497828	1.17×10-1	2.02×10-1	3.51619	2.40793
SMO	0.198638	2.87×10-1	4.33×10-1	332.383	381.443
ROCK2	0.0546316	6.22×10-1	8.08×10-1	3770.34	3915.28
TEK	-1.3497	1.51×10-25	3.37×10-24	506.119	198.284
FOXP3	1.41665	5.50×10-14	5.52×10-13	52.8655	141.396
BIRC5	1.51087	2.20×10-31	6.71×10-30	896.419	2555.07
RAD23B	0.251401	1.29×10-5	5.17×10-5	5629.69	6700.65
HTR7	-2.4568	6.97×10-51	4.82×10-49	43.824	7.89782
CD38	-1.03017	2.11×10-7	1.09×10-6	377.807	184.93
CCNE1	1.65807	7.86×10-29	2.10×10-27	157.29	496.915
DUSP4	3.30042	1.81×10-21	3.09×10-20	185.87	1832.34
FOXM1	1.4034	1.50×10-24	3.14×10-23	882.993	2336.02
USP14	0.382575	3.56×10-5	1.33×10-4	1817.71	2369.47
MSH6	0.698264	4.54×10-16	5.36×10-15	1170.98	1899.58
PIN1	-0.0757946	3.98×10-1	5.66×10-1	1429.84	1357.38
CDK1	1.59629	3.63×10-29	9.84×10-28	754.817	2282.47
PTK2	0.401969	1.75×10-7	9.15×10-7	3083.47	4073.55
CD82	0.544931	2.40×10-5	9.18×10-5	1571.83	2293.35
MEIS2	-1.94151	2.53×10-29	6.92×10-28	634.14	164.914
BCL2	-1.67275	8.55×10-38	3.56×10-36	973.138	304.995
ALCAM	0.834819	2.46×10-8	1.43×10-7	1090.5	1944.97
IL24	0.769833	3.91×10-3	9.77×10-3	68.5458	116.972
PIK3CB	-0.266001	8.13×10-4	2.35×10-3	2099.41	1745.24
COL18A1	0.704254	2.16×10-5	8.33×10-5	2594.81	4227.7
COX8A	-0.532079	2.01×10-7	1.04×10-6	8174.2	5653.27
BIRC7	2.31603	3.89×10-12	3.32×10-11	6.78042	34.2266
CARD8	-0.324727	1.62×10-4	5.37×10-4	753.709	601.101
DNMT3B	1.70095	1.86×10-26	4.35×10-25	73.8641	240.369
ASS1	-0.364241	1.87×10-2	4.01×10-2	19821.5	15399
DPYD	-1.72322	5.09×10-25	1.10×10-23	1028.06	311.207
EZR	-0.52839	8.51×10-9	5.19×10-8	22732	15760.7
CGA	1.60366	7.77×10-4	2.25×10-3	0.659398	2.1044
TKTL1	3.52214	2.22×10-6	1.00×10-5	5.03628	58.9584
CHI3L1	2.82715	3.51×10-22	6.29×10-21	158.43	1124.88
FUT4	0.492604	1.24×10-5	4.98×10-5	1625.99	2287.6
VTCN1	3.4743	6.24×10-10	4.30×10-9	1.61217	18.3138
GSTP1	1.19323	1.49×10-15	1.69×10-14	9917.68	22678.9
APOBEC3B	-1.65557	9.44×10-33	3.09×10-31	877.057	278.264
AURKA	1.59189	3.00×10-36	1.15×10-34	623.376	1879.33
PAEP	9.01543	4.41×10-18	6.00×10-17	0.438246	269.902
KISS1R	3.08923	4.55×10-13	4.24×10-12	1.55438	14.0102
ALPP	2.10541	4.59×10-5	1.68×10-4	6.33958	27.587
MAD2L1	1.5229	1.71×10-29	4.71×10-28	625.141	1796.62
PPP1R12A	-0.647183	2.49×10-12	2.17×10-11	2967.66	1894.2
NFE2L2	-0.357597	4.00×10-7	2.00×10-6	4652.94	3630.58
KLF4	-2.50815	2.64×10-93	7.61×10-91	14810.2	2603.34
YWHAZ	0.195692	4.70×10-2	9.09×10-2	30810.4	35285.7
TRAF2	0.591832	2.22×10-10	1.60×10-9	797.244	1201.92
AURKB	1.28653	3.69×10-21	6.23×10-20	479.103	1169.33
SNAI1	1.69798	4.91×10-27	1.19×10-25	72.7693	236.457
NCOA3	0.15015	1.26×10-1	2.15×10-1	1749	1940.2
CYP19A1	1.80307	2.15×10-9	1.40×10-8	6.1678	21.7846
CCAT1	4.58109	1.19×10-68	1.52×10-66	17.7815	428.651
SOX9	1.89688	8.85×10-44	4.79×10-42	2407.26	8965.22
CYP3A5	-0.445551	5.44×10-3	1.32×10-2	2343.56	1720.77
PDGFRB	0.821083	8.08×10-7	3.88×10-6	1855.12	3277.46
CTSB	0.297493	7.50×10-3	1.76×10-2	25771.4	31673.4
UMPS	0.61738	2.39×10-19	3.57×10-18	1052.55	1614.64
PXN	-0.363756	5.51×10-6	2.34×10-5	6637.89	5158.27
TNF	-0.702158	7.78×10-6	3.23×10-5	64.9075	39.8944
LIN28B	4.76278	8.64×10-6	3.56×10-5	0.31576	10.9077
WNT6	0.137188	7.05×10-1	8.87×10-1	20.4925	22.5595
ERCC1	0.231685	5.20×10-3	1.26×10-2	1140.78	1339.72
USP17L2	0.465741	4.49×10-1	6.24×10-1	0.123486	0.212533
PAWR	0.238099	1.25×10-2	2.79×10-2	2336.88	2755.7
AGO2	0.921121	9.55×10-18	1.27×10-16	1651.37	3126.77
ITGB1	-0.340549	3.90×10-4	1.20×10-3	12032	9501.51
PARK7	0.298876	9.89×10-4	2.81×10-3	4729.16	5817.83
SGK1	-2.77861	4.31×10-128	3.20×10-125	9060.53	1320.18
TFE3	-0.000543676	9.82×10-1	1.00×100	1755.52	1754.73
THY1	1.27583	3.57×10-13	3.35×10-12	1421.28	3441.52
KIT	-1.82187	3.69×10-27	8.97×10-26	958.055	270.862
SHH	2.13726	3.72×10-27	9.05×10-26	226.537	997.098
UCA1	0	1.00×100	1.00×100	4.16334e-17	4.16334e-17
FHIT	0.220515	5.14×10-2	9.84×10-2	217.645	253.641
JAK2	-0.394386	3.55×10-3	8.96×10-3	747.801	568.671
LGR5	2.8781	4.58×10-22	8.14×10-21	390.72	2873.36
TERF2	0.109724	5.81×10-2	1.10×10-1	1147.79	1238.07
SPP1	3.85202	3.06×10-20	4.84×10-19	394.216	5694.06
GLI1	-0.123373	4.11×10-1	5.81×10-1	150.191	137.816
CA9	5.52849	2.19×10-29	6.01×10-28	38.7543	1794.15
XIAP	-0.118469	1.73×10-1	2.82×10-1	3114.32	2868.29
PTGS2	0.762518	9.98×10-3	2.27×10-2	367.172	622.936
CTNNB1	0.529632	6.21×10-11	4.73×10-10	14398.6	20785.3
CBS	1.31741	2.49×10-4	7.94×10-4	4.0059	10.1526
NT5E	-0.23029	1.75×10-1	2.85×10-1	2536.89	2162.57
ITGA6	0.703382	5.15×10-10	3.58×10-9	9074.12	14775.4
CCND1	1.70684	4.94×10-49	3.21×10-47	2586.23	8442.8
IGFBP2	0.767278	3.20×10-3	8.14×10-3	3830.83	6520.41
NOTCH2	-0.35976	3.00×10-4	9.40×10-4	3531.64	2751.76
PRKDC	1.21203	2.06×10-21	3.51×10-20	4242.37	9827.9
BMP2	-1.92111	6.80×10-51	4.71×10-49	2173.43	573.859
ESR1	-1.17086	7.05×10-10	4.83×10-9	61.5987	27.2734
MAPK7	-0.780427	3.57×10-19	5.26×10-18	1056.86	615.512
GPX4	0.552611	2.09×10-5	8.08×10-5	4310.56	6323.05
CDK4	1.22724	6.80×10-29	1.82×10-27	1678.16	3929.24
TYMS	0.528121	1.04×10-4	3.56×10-4	838.496	1209.26
MELK	1.49532	4.05×10-34	1.41×10-32	399.888	1127.6
RBM3	0.510926	1.86×10-6	8.49×10-6	7231.77	10305
RNF43	2.30556	4.45×10-36	1.70×10-34	2042.48	10097.8
CDKN2B	-3.28615	2.70×10-154	4.65×10-151	5036.58	516.147
BCL6	-0.232289	4.68×10-2	9.07×10-2	700.945	596.491
PROS1	-0.339867	2.68×10-2	5.51×10-2	1293.45	1021.78
RAB25	0.218121	4.58×10-2	8.90×10-2	5007.47	5825.16
FGFR4	1.3455	1.00×10-13	9.87×10-13	1727.31	4389.84
XRCC1	0.495899	1.14×10-7	6.12×10-7	944.579	1331.98
VEGFA	1.47262	3.22×10-34	1.13×10-32	2272.44	6306.83
CDH11	1.53165	4.67×10-14	4.71×10-13	644.103	1862.28
SLC7A11	2.68935	2.93×10-30	8.37×10-29	143.352	925.337
TGFB1	0.246165	1.33×10-1	2.25×10-1	1380.24	1637.31
MME	-0.224223	3.92×10-1	5.59×10-1	956.906	819.038
APEX1	0.606631	2.09×10-10	1.51×10-9	3640.74	5543.96
PAX2	2.74804	7.08×10-8	3.88×10-7	0.831743	6.04616
MYC	1.91789	3.24×10-38	1.37×10-36	2783.66	10519.2
BIRC2	-0.407648	1.93×10-6	8.79×10-6	2059.1	1551.74
TIMP1	1.97803	3.86×10-37	1.55×10-35	2668.97	10515
YES1	-0.27107	8.84×10-3	2.04×10-2	2545.89	2109.39
VCP	0.299245	1.35×10-4	4.51×10-4	10736.5	13211.5
GAL	1.33454	6.32×10-5	2.25×10-4	164.334	414.614
CHD1L	0.314371	7.88×10-5	2.76×10-4	1359.74	1690.4
PDK4	-3.38685	1.77×10-141	2.13×10-138	6278.5	599.986
FUT8	0.858098	1.24×10-9	8.30×10-9	907.241	1644.55
PTCSC3	1.79831	3.17×10-3	8.08×10-3	0.0323085	0.418535
STAT1	0.244235	9.20×10-2	1.64×10-1	6644.59	7870.12
SCLC1	#N/A	#N/A	#N/A	#N/A	#N/A
TNFSF13	-0.910629	9.34×10-14	9.21×10-13	1009.98	537.132
DLL4	0.493437	4.69×10-5	1.71×10-4	684.072	963.326
SLC2A1	1.81885	1.24×10-18	1.76×10-17	2891.48	10201.6
EPCAM	-0.353804	7.74×10-5	2.71×10-4	51043	39941.9
BSG	-0.976157	6.18×10-25	1.32×10-23	53705.4	27300.4
PROC	0.523927	6.93×10-3	1.64×10-2	60.2224	86.6944
DEPDC1	0.912656	1.82×10-9	1.19×10-8	292.998	551.508
PTPRC	-1.08317	1.25×10-9	8.37×10-9	2119.92	1000.42
CCR4	-0.151825	4.17×10-1	5.87×10-1	64.167	57.7253
ANXA2	0.277203	1.89×10-2	4.04×10-2	25302	30662.1
YBX1	0.190082	2.34×10-2	4.89×10-2	17319.7	19758.8
PSMD9	-0.114742	1.27×10-1	2.16×10-1	753.441	695.753
IDO1	0.493911	1.50×10-1	2.49×10-1	542.458	763.919
PPP1R13L	1.22789	7.29×10-18	9.77×10-17	625.549	1465.81
HMOX1	-1.68632	1.25×10-51	9.00×10-50	3016.77	937.288
MDC1	0.651549	8.70×10-11	6.52×10-10	993.427	1560.08
FLT1	0.329196	1.27×10-2	2.82×10-2	780.364	980.039
EIF4E	0.0676557	5.37×10-1	7.19×10-1	1291.22	1352.7
HOTAIR	3.36949	5.84×10-7	2.85×10-6	2.21748	23.4703
AXL	-1.15568	2.73×10-18	3.78×10-17	2081.9	934.425
CD276	1.04151	2.48×10-22	4.50×10-21	1551.1	3193.27
SPAG5	1.04316	5.07×10-20	7.90×10-19	677.132	1395.31
GATA3	-0.0663857	6.86×10-1	8.70×10-1	70.0235	66.9788
BRCA2	2.07028	4.09×10-34	1.43×10-32	149.584	628.533
LGALS7	2.07174	2.23×10-4	7.19×10-4	0.181185	1.05691
NAMPT	0.365175	6.85×10-3	1.62×10-2	3398.65	4377.33
ERCC4	0.0976907	2.63×10-1	4.03×10-1	221.78	236.721
FOXC2	1.31766	2.07×10-5	8.02×10-5	15.3066	38.3308
ZNF582	-1.32812	3.30×10-17	4.22×10-16	55.1411	21.8843
KIAA0101(PCLAF)	1.01847	3.31×10-12	2.84×10-11	#N/A	#N/A
TRPC5	1.92366	1.59×10-3	4.33×10-3	0.394756	1.79988
NTRK2	-0.739642	1.45×10-2	3.17×10-2	659.163	394.698
GSTM1	-1.32697	7.60×10-6	3.16×10-5	409.4	163.104
IL10	-1.24961	5.98×10-12	5.02×10-11	39.0353	16.3601
MAPK1	-0.36711	1.67×10-9	1.10×10-8	5540.35	4295.04
DKK3	0.128047	3.69×10-1	5.32×10-1	1735.12	1896.1
LRP1	-0.467885	2.73×10-4	8.63×10-4	18295	13227.7
POSTN	1.29373	2.14×10-6	9.66×10-6	2579.24	6323.45
API5	0.113276	1.80×10-1	2.91×10-1	3497	3782.01
RIPK3	-0.93297	6.24×10-29	1.68×10-27	1285.98	673.736
BIRC6	-0.03814	6.92×10-1	8.75×10-1	3491.41	3399.73
MMP14	1.12194	3.60×10-12	3.08×10-11	4616.22	10046.8
MDM2	0.438645	1.03×10-3	2.91×10-3	1480.52	2006.58
EGFR	-0.827719	7.29×10-16	8.48×10-15	3971.92	2237.41
SOD1	-0.0244547	7.97×10-1	9.73×10-1	7488.3	7362.61
CXCR3	0.102346	5.74×10-1	7.59×10-1	219.128	235.414
CTLA4	1.12352	2.71×10-8	1.56×10-7	34.9225	76.2358
NR4A1	-0.199918	2.95×10-1	4.42×10-1	4352.52	3789.29
PRC1	1.23334	1.17×10-27	2.93×10-26	925.889	2176.95
ERBB2	0.00553417	9.92×10-1	1.00×100	12323.3	12370.7
CREB1	-0.0487063	5.22×10-1	7.04×10-1	1297.74	1253.72
ASPG	-3.05179	1.36×10-56	1.14×10-54	455.824	54.9172
LGALS3	-1.16508	1.81×10-27	4.49×10-26	59702.1	26623.5
IL4	0.32271	3.35×10-1	4.92×10-1	0.577965	0.720198
DIABLO	-0.0123821	8.18×10-1	9.91×10-1	300.85	297.782
GBP1	-0.303378	7.49×10-2	1.37×10-1	2032.98	1647.28
HOXC10	1.37528	6.44×10-3	1.53×10-2	7.11355	18.5897
EML4	0.190213	1.70×10-2	3.68×10-2	3672.19	4189.13
TACSTD2	4.82639	2.59×10-27	6.36×10-26	53.5289	1522.23
MAPK8	-0.0945631	1.74×10-1	2.84×10-1	1099.88	1029.49
F2R	0.961728	1.80×10-12	1.59×10-11	704.761	1372.38
THBS1	-0.441396	4.51×10-3	1.11×10-2	12491.6	9198.95
MAP2K7	-0.0775867	3.04×10-1	4.54×10-1	1462.95	1386.24
TXNRD1	-0.00652227	9.22×10-1	1.00×100	4404.09	4383.71
DAXX	0.181629	1.52×10-2	3.31×10-2	2197.01	2491.49
GPER1	-2.12626	3.12×10-34	1.10×10-32	406.981	93.1958
MTDH	0.540207	5.37×10-9	3.35×10-8	4185.49	6086.05
PMAIP1	2.02338	7.05×10-28	1.79×10-26	126.025	512.609
MYCN	2.43642	1.19×10-12	1.07×10-11	27.2841	148.299
NCL	0.847017	2.32×10-17	3.01×10-16	15427.8	27750.8
NCOA1	-0.887291	1.48×10-32	4.79×10-31	2408.72	1301.4
SNCG	-1.79709	6.01×10-21	9.99×10-20	278.277	80.0438
CHEK2	0.964429	1.41×10-21	2.43×10-20	361.25	704.789
TERT	1.65293	2.22×10-12	1.94×10-11	29.7196	93.8363
PTH	1.32003	4.23×10-2	8.29×10-2	0.0202976	0.222468
RB1	0.380649	1.40×10-3	3.84×10-3	1706.38	2221.21
PTPN6	-0.199142	1.57×10-2	3.42×10-2	2186.63	1905.03
WFDC2	-0.752595	4.56×10-3	1.12×10-2	2745.1	1629.24
REG1A	1.95364	1.02×10-3	2.90×10-3	4705.64	18227.1
SRC	0.165135	1.03×10-1	1.81×10-1	4392.84	4925.67
MTA1	0.711455	1.47×10-11	1.19×10-10	1277.03	2091.57
CDK2	1.03342	1.78×10-34	6.34×10-33	706.609	1446.13
PGR	-2.66701	1.56×10-50	1.07×10-48	201.897	31.6145
NACC1	0.166156	1.08×10-1	1.89×10-1	2650.19	2973.98
TWIST2	-1.39793	2.21×10-15	2.47×10-14	117.823	44.6748
VCAN	1.41311	9.89×10-10	6.67×10-9	1480.98	3944.07
GLI2	-0.345397	4.33×10-2	8.46×10-2	192.885	151.76
CCL5	-1.36734	3.99×10-14	4.05×10-13	1685.52	653.219
TP53	0.703408	9.21×10-6	3.78×10-5	2525.56	4112.71
MAP1LC3A	0.291157	4.06×10-2	8.00×10-2	867.044	1061.25
PDCD1	0.183397	3.98×10-1	5.65×10-1	57.7202	65.5992
SRA1	-0.0336741	6.84×10-1	8.67×10-1	1198.27	1171.14
AKR1C1	-1.02049	3.67×10-8	2.08×10-7	267.33	131.678
CDKN1A	-1.13963	1.63×10-18	2.30×10-17	12056	5472.04
ADAM17	0.388744	3.69×10-7	1.85×10-6	583.998	763.829
GATA2	-0.602431	1.32×10-4	4.43×10-4	296.402	195.256
DOK2	-1.00119	5.55×10-11	4.26×10-10	428.227	213.945
CFLAR	-0.458631	3.63×10-12	3.10×10-11	4065.69	2957.51
GPC3	0.245994	4.27×10-1	5.99×10-1	272.564	323.265
GRP	1.96757	2.82×10-8	1.62×10-7	11.9446	46.8981
CIAPIN1	0.466583	2.54×10-9	1.64×10-8	1527.27	2110.81
CD47	0.522808	8.13×10-9	4.97×10-8	3024.5	4345.18
IDH1	-0.241371	5.21×10-3	1.27×10-2	7661.35	6480.85
XRCC5	0.378657	7.78×10-8	4.25×10-7	9148.61	11893.9
POU5F1	0.306554	4.67×10-2	9.04×10-2	86.5395	106.926
BMI1	0.0451027	6.71×10-1	8.56×10-1	1066.83	1100.13
NFKB1	-0.271083	2.41×10-5	9.22×10-5	2955.41	2449.01
SIRT1	-0.327739	1.09×10-4	3.73×10-4	972.701	774.439
IL1B	1.18106	3.54×10-5	1.32×10-4	406.565	921.979
HPSE	-1.00206	2.12×10-13	2.03×10-12	728.668	363.758
DCN	-1.8309	1.33×10-29	3.67×10-28	21871.3	6147.62
EPAS1	-1.23915	1.60×10-44	8.91×10-43	10971.1	4647.29
MLH1	-0.13515	2.38×10-1	3.70×10-1	976.908	889.378
TLR2	0.491076	9.79×10-3	2.23×10-2	196.119	275.601
SERPINB3	5.65183	9.72×10-9	5.90×10-8	0.24806	17.2676
IFITM1	1.75835	7.38×10-22	1.30×10-20	3176.82	10748
GAS6	-0.324515	1.33×10-2	2.94×10-2	6482.06	5176.6
PLAUR	0.530966	1.25×10-4	4.23×10-4	1794.68	2593.34
FLT4	-0.409454	2.69×10-3	6.96×10-3	333.102	250.744
NME1	1.71157	3.11×10-38	1.32×10-36	861.479	2821.88
ESR2	-1.11702	1.10×10-12	9.86×10-12	45.5108	20.8815
BRAF	0.12338	1.96×10-1	3.14×10-1	712.587	775.65
TWIST1	1.84032	2.03×10-14	2.11×10-13	29.3589	105.416
EPO	1.05435	1.22×10-4	4.11×10-4	0.697615	1.6019
C2orf40	-4.25002	7.43×10-91	2.00×10-88	226.035	11.7679
CYR61	-0.065366	6.97×10-1	8.79×10-1	2592.52	2477.62
RALBP1	-0.467787	1.33×10-8	7.98×10-8	3265.9	2361.06
CTTN	0.0601719	4.02×10-1	5.70×10-1	8756.08	9129.17
LAPTM4B	1.49463	5.53×10-16	6.49×10-15	2337.33	6586.7
HGF	-0.0977106	5.56×10-1	7.40×10-1	134.138	125.201
TYMP	0.386912	5.29×10-2	1.01×10-1	1650.47	2158.34
ARID1A	-0.168055	4.65×10-2	9.01×10-2	4035.41	3591.4
SOX2	1.40313	1.06×10-2	2.39×10-2	42.888	113.668
CYP1B1	-0.497147	6.35×10-2	1.18×10-1	318.712	225.766
AGR2	-0.0519518	7.70×10-1	9.48×10-1	32637.7	31483.3
FANCD2	1.18649	6.35×10-29	1.70×10-27	419.017	953.85
HMGB1	0.606949	1.28×10-6	5.98×10-6	6900.7	10509.5
PGK1	0.707288	5.61×10-11	4.29×10-10	14554.1	23763.2
ERBB4	-1.89372	4.93×10-10	3.43×10-9	9.32214	2.43948
RAC1	0.00254173	9.84×10-1	1.00×100	12846.6	12868.9
NFE2	1.77952	9.30×10-8	5.04×10-7	13.9101	48.0639
PTEN	-0.62283	3.14×10-12	2.70×10-11	3716	2412.63
ANXA1	0.225502	2.61×10-1	4.00×10-1	2517.24	2943.07
SETD2	-0.117944	1.12×10-1	1.93×10-1	2577.25	2373.94
S100P	2.35645	5.47×10-23	1.04×10-21	1718.43	8800.79
SERPINB5	3.48597	2.15×10-22	3.92×10-21	228.276	2558.73
CD4	-1.05979	8.02×10-14	7.95×10-13	2352.28	1128.29
IRF1	-0.264861	4.02×10-2	7.93×10-2	4929.1	4102.44
PTK2B	-1.25851	3.89×10-41	1.88×10-39	4334.58	1811.61
SOX4	1.71066	9.28×10-45	5.21×10-43	1757.56	5752.81
NANOG	0.363737	2.30×10-1	3.60×10-1	0.615054	0.842894
NRP1	-0.516833	4.89×10-4	1.47×10-3	1876.06	1310.93
NLRP3	-0.697293	6.99×10-6	2.92×10-5	144.517	88.9812
FASN	1.48721	2.12×10-21	3.61×10-20	4782.59	13408.4
CD33	-1.33638	7.59×10-20	1.17×10-18	140.645	55.6452
WHSC1(NSD2)	0.354148	3.87×10-5	1.44×10-4	#N/A	#N/A
AKR1B10	-3.11188	1.86×10-51	1.32×10-49	4889.67	565.504
PRL	1.58209	4.45×10-4	1.35×10-3	0.835454	2.60672
EPHA2	0.679231	9.11×10-6	3.74×10-5	2598.42	4161.05
SQSTM1	0.144905	1.13×10-1	1.96×10-1	9021.13	9974.26
CD55	1.10879	4.04×10-8	2.29×10-7	2786.49	6009.62
MTHFR	-0.772431	2.26×10-18	3.15×10-17	1461.64	855.344
UCHL1	-2.0743	3.20×10-26	7.38×10-25	660.655	156.761
CDK12	0.62819	2.33×10-8	1.36×10-7	1753.14	2709.37
PLK1	1.51811	6.69×10-29	1.79×10-27	904.422	2591.14
DICER1	-0.251737	1.96×10-2	4.17×10-2	2015.53	1692.34
DPP4	-0.540921	8.22×10-3	1.91×10-2	2152.24	1479.25
IFNA2	-0.625033	3.36×10-2	6.75×10-2	0.108128	0.0235644
LGALS1	-0.208187	2.04×10-1	3.25×10-1	6447.42	5581.18
ALK	-1.94108	1.21×10-9	8.12×10-9	29.779	7.32894
EZH2	1.33312	5.04×10-44	2.77×10-42	516.769	1302.22
MUC16	4.37585	5.98×10-12	5.02×10-11	3.57275	75.9821
FAS	-1.25387	3.49×10-23	6.67×10-22	1292.85	542.043
BDNF	1.17414	1.26×10-8	7.54×10-8	13.8056	31.2585
CDKN1B	0.110666	2.59×10-1	3.98×10-1	2648.36	2859.09
OSMR	-0.0962277	5.39×10-1	7.22×10-1	667.754	624.485
HSPB3	-2.11189	1.20×10-9	8.03×10-9	73.4145	16.8827
TNFSF10	-1.52891	1.82×10-53	1.39×10-51	6399.25	2217.32
CHEK1	1.25153	9.70×10-31	2.85×10-29	443.405	1055.66
HAS2-AS1	0.740979	4.71×10-3	1.16×10-2	31.8381	53.2774
MUC1	-0.421972	4.05×10-2	7.97×10-2	8308.27	6201.34
SKP2	1.08944	9.54×10-21	1.57×10-19	579.539	1233.19
GOLPH3	-0.233084	2.03×10-4	6.60×10-4	4889.76	4159.91
XRCC6	0.0603185	4.45×10-1	6.19×10-1	10718.3	11175.9
DCLK1	-2.86737	1.44×10-58	1.32×10-56	429.614	58.713
BCL9	0.318989	5.28×10-4	1.58×10-3	1004.15	1252.11
CXCR2	0.544027	5.13×10-2	9.82×10-2	47.8152	69.7602
CD40	-0.210684	2.11×10-1	3.34×10-1	503.93	435.421
E2F1	1.89267	5.34×10-38	2.24×10-36	334.65	1243.47
CASP8	0.120255	1.26×10-1	2.15×10-1	1188.53	1291.08
IGFBP7	0.584203	1.53×10-4	5.09×10-4	6792.04	10182.9
PRDX1	0.432265	5.89×10-6	2.49×10-5	7123.02	9611.26
CDH2	-0.467342	3.87×10-2	7.66×10-2	116.588	84.2474
EHMT2	0.852536	1.32×10-17	1.74×10-16	1840.72	3324.22
PIWIL1	4.85908	4.41×10-19	6.46×10-18	9.69676	283.105
KRAS	-0.652357	2.85×10-12	2.47×10-11	3045.21	1936.97
HOXB13	-1.45459	2.79×10-9	1.80×10-8	2996.94	1093.37
GALR1	-3.6611	5.77×10-48	3.60×10-46	23.0236	1.72663
BAG1	-0.423192	1.00×10-7	5.40×10-7	4350.8	3244.68
JAG1	-0.10182	3.51×10-1	5.11×10-1	3919.57	3652.42
HSPA4	0.305822	9.30×10-5	3.21×10-4	4018.47	4966.82
NEAT1	1.20419	1.09×10-5	4.42×10-5	8584.45	19779.4
RHOA	-0.170245	7.44×10-3	1.75×10-2	20510	18227
CALCA	5.23361	6.13×10-13	5.64×10-12	2.98079	115.109
TP73	2.26245	4.16×10-20	6.51×10-19	38.1752	183.827
SERPINA1	0.417258	1.35×10-1	2.28×10-1	9952.26	13290.2
RET	-0.930695	1.48×10-4	4.93×10-4	232.383	121.854
MASTL	0.981929	8.63×10-23	1.61×10-21	302.065	596.443
RUNX1	1.3848	4.58×10-33	1.52×10-31	1040.91	2718.11
CXCL8	3.49955	2.13×10-17	2.76×10-16	402.416	4552.03
AFP	4.55298	1.32×10-13	1.29×10-12	0.817904	20.811
ABCB1	-1.76039	3.28×10-19	4.85×10-18	4645.55	1371.13
DYRK2	-0.982386	2.76×10-39	1.24×10-37	4580.3	2317.64
NR3C1	-1.79977	4.50×10-40	2.08×10-38	1646.54	472.631
IL17A	2.40254	3.58×10-9	2.28×10-8	2.54209	13.7615
KIAA1524	1.37822	2.52×10-25	5.54×10-24	182.88	475.278
MTOR	-0.190782	1.10×10-2	2.49×10-2	2576.51	2257.02
STUB1	0.179605	1.36×10-1	2.29×10-1	1397.61	1583.47
WT1	4.77358	1.41×10-22	2.61×10-21	2.79536	78.5745
TXNRD2	0.249725	1.14×10-2	2.55×10-2	741.546	882.242
TRPV2	-0.268543	4.68×10-2	9.06×10-2	505.113	419.412
CDK6	0.769698	3.59×10-10	2.53×10-9	1398.42	2384.09
CD248	-0.341788	4.06×10-2	7.98×10-2	1814.99	1432.16
VEGFC	-0.240176	1.10×10-1	1.92×10-1	130.993	110.748
VIM	-0.780911	1.56×10-9	1.03×10-8	16030.8	9329.68
WARS	0.322361	5.27×10-2	1.01×10-1	5666.03	7084.71
CSF3	1.60054	7.26×10-6	3.03×10-5	35.6912	108.295
PTK7	2.07085	1.53×10-21	2.62×10-20	861.669	3620.69
SCD	2.34836	7.58×10-38	3.17×10-36	3698.21	18833.4
PDPK1	-0.27159	5.87×10-4	1.74×10-3	1716.07	1420.93
STAT3	-0.342211	1.57×10-7	8.27×10-7	8876.19	7001.48
SPHK1	1.83172	1.75×10-14	1.83×10-13	139.044	495.352
IL22	-0.210493	5.20×10-1	7.01×10-1	3.45492	2.92034
APAF1	-0.341113	1.24×10-4	4.18×10-4	1309.36	1033.25
EIF5A2	1.28092	1.92×10-23	3.74×10-22	153.236	372.102
H19	3.93835	9.38×10-16	1.08×10-14	131.802	2022.34
TBX1	-0.97183	2.18×10-6	9.83×10-6	35.0305	17.8665
ATM	0.058915	6.53×10-1	8.38×10-1	1009.18	1050.79
LIG4	-0.395027	3.20×10-4	9.98×10-4	528.34	401.289
BMP4	1.94237	2.46×10-19	3.66×10-18	735.774	2828.23
NEUROD1	-1.5225	9.29×10-4	2.65×10-3	79.7353	27.8377
ABCB5	-3.40222	1.89×10-36	7.33×10-35	48.286	4.49272
CBX8	1.7249	2.37×10-57	2.05×10-55	174.027	575.925
CD9	-0.13791	1.39×10-1	2.34×10-1	21462.2	19505.7
VDAC1	0.324101	8.21×10-5	2.87×10-4	10136.5	12689.4
ASRGL1	-0.10471	5.54×10-1	7.38×10-1	627.235	583.369
SMAD4	-0.587831	6.89×10-11	5.22×10-10	2353.75	1565.92
CTSD	-0.776318	7.22×10-13	6.60×10-12	35761.6	20879.7
PTCH1	-0.00232038	9.65×10-1	1.00×100	1710.65	1707.78
TP53BP1	0.267198	7.66×10-3	1.79×10-2	1075.63	1294.14
PPP2R4(PTPA)	0.113873	1.80×10-1	2.92×10-1	#N/A	#N/A
KEAP1	0.29852	3.50×10-3	8.83×10-3	2816.79	3464.99
MUC4	-1.26277	5.72×10-8	3.18×10-7	7611.24	3171.89
FOXD2-AS1	-0.0352419	7.85×10-1	9.62×10-1	420.404	410.291
S100A8	0.042768	9.22×10-1	1.00×100	237.505	244.628
MGMT	0.133804	4.74×10-1	6.52×10-1	888.909	975.442
EGR3	-0.169879	4.11×10-1	5.80×10-1	364.169	323.672
CCL2	-0.686446	8.83×10-5	3.07×10-4	760.151	472.259
PRNP	-1.03102	2.72×10-17	3.50×10-16	4435.85	2170.5
TXNIP	-1.6065	3.31×10-45	1.89×10-43	42585.8	13984.6
SKA1	1.26093	1.04×10-19	1.60×10-18	161.705	387.835
DCTN6	-0.0951001	3.51×10-1	5.10×10-1	699.044	654.132
IL6	0.609547	4.15×10-2	8.14×10-2	109.004	166.322
HMGA2	1.60926	3.95×10-11	3.06×10-10	216.108	659.588
MVP	-0.886478	1.11×10-20	1.82×10-19	26893.2	14547.6
EPOR	0.293089	3.59×10-2	7.16×10-2	105.401	129.259
HSP90AA1	0.65219	4.72×10-10	3.29×10-9	25882.7	40675.7
CASP3	-0.46689	4.75×10-9	2.98×10-8	2435.92	1762.15
ANGPT2	1.43354	2.27×10-22	4.12×10-21	108.008	291.659
PARP1	0.3625	1.60×10-5	6.32×10-5	4416.81	5678.11
ITGA4	-0.952015	6.78×10-11	5.15×10-10	663.753	342.878
VDR	-1.08051	4.53×10-32	1.43×10-30	7293.47	3448.62
MAGEC2	6.67639	1.09×10-7	5.85×10-7	0.0775385	18.2635
CD34	-0.771344	4.63×10-11	3.57×10-10	1669.25	977.634
FASLG	-0.884394	7.04×10-6	2.94×10-5	51.9915	28.1097
KDR	0.0372075	7.94×10-1	9.70×10-1	578.503	593.244
ABCG2	-4.81643	2.69×10-219	2.32×10-215	2877.51	102.026
EDIL3	-2.12112	5.24×10-62	5.37×10-60	3174.49	729.432
PECAM1	-0.637251	2.19×10-7	1.13×10-6	4336.91	2788.05
MYD88	-0.448738	1.12×10-10	8.34×10-10	3965.36	2905.55
HOXA11-AS	-0.133016	4.58×10-1	6.34×10-1	661.337	603.077
PML	0.643436	4.53×10-8	2.55×10-7	1934.77	3022.52
DAB2	-0.101416	4.02×10-1	5.70×10-1	2716.76	2532.09
CD24	-0.789031	1.90×10-8	1.12×10-7	56493.4	32694.4
FAP	3.13602	1.87×10-24	3.87×10-23	53.1948	468.324
COPS5	0.327825	1.10×10-4	3.74×10-4	1878.6	2357.49
DUSP6	0.238822	7.33×10-2	1.34×10-1	2642.2	3117.77
S100A4	0.362351	9.26×10-2	1.65×10-1	2392.4	3075.51
MAP2K5	-0.250204	2.50×10-4	7.96×10-4	795.01	668.632
LILRB1	-0.741985	6.06×10-6	2.56×10-5	258.048	154.215
DNMT1	0.955062	7.74×10-22	1.36×10-20	1974.87	3828.84
ID4	-0.113804	5.13×10-1	6.95×10-1	355.207	328.233
TRIM21	-0.196116	2.51×10-2	5.21×10-2	1306.45	1140.32
CFI	0.944678	3.38×10-6	1.49×10-5	331.401	637.903
SLC7A5	3.08067	4.29×10-57	3.68×10-55	875.707	7409.78
PALB2	0.936421	1.02×10-32	3.32×10-31	348.745	666.8
PIK3CG	-1.8145	3.30×10-29	8.98×10-28	363.606	103.196
UBE2C	2.19642	2.00×10-48	1.27×10-46	705.791	3235.53
SP1	-0.147493	2.14×10-2	4.51×10-2	4448.67	4015.34
GSTK1	-0.159123	9.18×10-2	1.63×10-1	7936.31	7107.67
S1PR1	-1.15053	2.57×10-20	4.09×10-19	821.812	369.936
PIK3CA	-0.220426	2.59×10-2	5.34×10-2	732.161	627.769
DAB2IP	-0.86322	5.50×10-20	8.56×10-19	7041.8	3871
IL2	-1.82506	1.66×10-14	1.74×10-13	2.94935	0.753176
FADD	0.128692	1.68×10-1	2.76×10-1	446.215	488.46
ERBB3	0.0466123	6.15×10-1	8.01×10-1	12167.8	12567.1
SDC1	0.143399	1.51×10-1	2.51×10-1	9986.35	11030.2
IGFBP1	3.38854	2.96×10-10	2.10×10-9	2.36927	25.4731
CDH1	-0.380378	2.39×10-5	9.15×10-5	29040.4	22309.5
IFNG	0.865363	6.48×10-3	1.54×10-2	7.32171	13.3661
HSPA5	0.342179	3.43×10-4	1.06×10-3	19090.5	24200.2
RETN	1.81257	2.38×10-6	1.07×10-5	2.13516	7.71584
LATS1	0.00507192	9.71×10-1	1.00×100	1052.22	1055.27
XPA	-0.18055	8.73×10-3	2.02×10-2	405.309	357.006
HTATIP2	-0.474275	5.99×10-8	3.32×10-7	3564.9	2565.87
FGF2	-1.69149	1.03×10-20	1.68×10-19	400.649	123.867
CLU	-2.37743	5.20×10-43	2.73×10-41	10707.5	2060.55
CXCL12	-2.68749	1.02×10-84	2.14×10-82	4923.25	764.003
TET2	-0.562293	5.99×10-7	2.92×10-6	1002.94	678.807
HK2	-1.2565	1.52×10-30	4.41×10-29	12845.6	5376.44
RRM2	1.50097	1.83×10-32	5.89×10-31	1473.07	4169.65
EPHX1	-0.875374	1.40×10-15	1.59×10-14	3405.47	1856.25
TOP2A	1.48635	1.02×10-27	2.57×10-26	2177.97	6102.27
NR5A2	-2.31112	2.16×10-81	4.18×10-79	1834.68	369.569
IGF1R	0.0789727	4.48×10-1	6.22×10-1	1949.57	2059.06
TNFAIP8	-0.336314	6.44×10-3	1.53×10-2	698.46	553.03
ICAM1	0.593992	1.71×10-4	5.64×10-4	942.862	1423.26
ABAT	-0.477258	6.44×10-3	1.53×10-2	1408.56	1011.74
CAV1	-2.05096	1.96×10-50	1.34×10-48	5842.3	1409.72
ALDH1A1	-1.01217	3.69×10-6	1.61×10-5	5635.78	2794.13
BCL2L1	0.959138	1.53×10-15	1.73×10-14	2784.5	5413.57
MAPK3	-1.00429	2.53×10-22	4.58×10-21	9401.17	4686.95
PCDH10	-3.04593	8.04×10-39	3.53×10-37	44.8212	5.3313
CTSL	-0.39684	6.85×10-3	1.62×10-2	2750.98	2089.36
CASZ1	-0.904834	1.52×10-23	2.97×10-22	1497.94	799.987
HSP90B1	0.587641	9.90×10-8	5.35×10-7	22779.6	34232.5
RELA	0.0649549	3.59×10-1	5.20×10-1	3433.01	3591.27
HIF1A	-0.127651	2.90×10-1	4.36×10-1	3919.51	3587.28
GRN	-0.436977	1.24×10-4	4.19×10-4	23188	17128.9
TGFA	-0.93765	6.35×10-16	7.42×10-15	1579.26	824.369
PROM1	-0.120921	5.55×10-1	7.39×10-1	3954.21	3636.28
LYPD5	0.512751	1.11×10-2	2.49×10-2	110.939	158.383
HSF1	0.734633	9.65×10-10	6.52×10-9	2772.97	4614.61
HOXA9	1.01144	1.20×10-6	5.62×10-6	548.713	1106.25
MSH2	0.742401	4.26×10-13	3.98×10-12	850.268	1422.15
KMT2A	-0.0666968	4.99×10-1	6.79×10-1	2305.82	2200.98
ZEB2	-1.36259	1.10×10-17	1.46×10-16	1776.1	690.454
RRM1	0.457376	2.60×10-7	1.33×10-6	2298.54	3155.73
SALL4	4.85094	1.37×10-57	1.21×10-55	4.65054	137.94
AQP1	-1.11328	6.49×10-12	5.42×10-11	4372.1	2020.86
TLR4	0.00290626	9.84×10-1	1.00×100	800.677	802.228
SERPINE1	1.91903	1.65×10-12	1.46×10-11	439.505	1662.31
CYP2C8	-1.77806	1.36×10-21	2.35×10-20	23.2746	6.67864
DHDH	-0.802172	6.58×10-5	2.33×10-4	84.7989	48.573
MSLN	2.89512	3.74×10-14	3.80×10-13	380.646	2832.42
WWTR1	-1.21557	1.48×10-15	1.68×10-14	2065.55	889.149
IFNA1	1.26489	5.00×10-3	1.22×10-2	0.0176377	0.200117
RAD51	0.692661	1.79×10-9	1.17×10-8	369.405	597.317
PKM	0.945573	1.59×10-14	1.67×10-13	23075.1	44441.9
CACYBP	0.642389	4.00×10-11	3.10×10-10	1846.26	2881.52
GSTO1	0.285607	1.23×10-2	2.74×10-2	2943.02	3587.49
CCND2	0.734209	6.42×10-5	2.28×10-4	4448.91	7400.86
AKT1	-0.0378764	6.36×10-1	8.21×10-1	4972.87	4844.47
FOXP1	-0.310964	1.73×10-3	4.67×10-3	2894.67	2333.2
USP22	-0.060153	4.60×10-1	6.37×10-1	5934.7	5692.21
NES	0.414231	2.12×10-2	4.48×10-2	1191.64	1587.92
RAB27A	-1.66461	1.10×10-72	1.61×10-70	2632.43	830.008
YAP1	0.485673	9.41×10-7	4.47×10-6	2831.57	3964.27
MUC5AC	4.13752	2.36×10-11	1.87×10-10	113.374	1996.09
KIF20A	1.60524	9.76×10-42	4.81×10-40	318.652	969.78
MALAT1	3.30258	1.56×10-13	1.51×10-12	2468.91	24361.3
KRT5	4.38726	7.72×10-9	4.73×10-8	20.2655	425.916
IL11	4.46512	1.06×10-30	3.11×10-29	7.62023	170.676
KITLG	-1.17081	2.69×10-19	4.00×10-18	2020.68	897.286
HDGF	0.564162	1.64×10-11	1.32×10-10	10182.6	15054.8
LCN2	2.14978	8.04×10-11	6.05×10-10	5344.66	23717.8
TXN	0.162928	1.22×10-1	2.09×10-1	9704.76	10864.8
SPARC	1.37851	2.82×10-13	2.67×10-12	12326.5	32048.9
BECN1	-0.334143	4.01×10-7	2.00×10-6	2894.81	2295.65
SERPINC1	-0.796124	1.77×10-3	4.78×10-3	6.10774	3.4283
NR1I2	-0.218653	1.65×10-1	2.71×10-1	1831.19	1573.67
FOXO3	-0.120007	2.60×10-1	3.98×10-1	2617.66	2408.24
IFNB1	1.06958	1.37×10-2	3.02×10-2	0.0716292	0.257469
CTHRC1	3.75929	7.44×10-40	3.42×10-38	81.6045	1106.55
CDKN2A	2.95155	2.96×10-19	4.39×10-18	45.8259	355.449
METTL3	0.646587	1.98×10-18	2.77×10-17	689.044	1078.51
TRPS1	-0.675478	5.31×10-4	1.59×10-3	298.718	186.871
JUN	0.319363	1.19×10-2	2.66×10-2	8222.17	10259.6
NOTCH3	1.30788	2.43×10-14	2.50×10-13	1148.64	2843.99
AR	-1.84995	1.47×10-21	2.54×10-20	216.738	59.9928
SNAI2	-0.358152	1.64×10-2	3.56×10-2	290.751	226.687
TFF3	0.00376942	9.79×10-1	1.00×100	29543.5	29620.9
NOTCH1	0.529298	5.15×10-5	1.87×10-4	3635.98	5247.91
BAX	0.386365	5.48×10-4	1.63×10-3	2342.32	3062
CD274	0.142537	5.20×10-1	7.01×10-1	145.618	160.694
PRKCA	-0.608183	1.71×10-9	1.12×10-8	2217.64	1454.43
CYP3A4	-5.13172	1.29×10-108	5.44×10-106	1322.44	37.6031
IGF2BP1	5.04598	3.95×10-14	4.01×10-13	6.25021	210.249
ERCC2	0.697459	4.03×10-11	3.12×10-10	712.733	1156.34
HDAC6	0.0709068	4.23×10-1	5.94×10-1	1698.05	1783.71
HCLS1	-1.16232	1.95×10-18	2.73×10-17	1614.22	721.022
S100A9	0.851667	6.55×10-4	1.92×10-3	696.483	1256.97
CSF2	3.44681	7.23×10-19	1.04×10-17	2.30027	26.1295
RPS6KB1	0.156432	1.08×10-1	1.89×10-1	847.339	943.674
BIRC3	-0.748054	1.30×10-5	5.19×10-5	2533.53	1508.32
MMP9	1.36127	4.07×10-7	2.03×10-6	738.666	1897.9
TOP1	0.350815	3.77×10-4	1.16×10-3	4189.23	5341.82
FDR, false discovery rate; T, tumor; N, normal.
